# Supplementary material for: Valorization of Quercus suber L. Bark as a Source of Phytochemicals with Antimicrobial Activity against Apple Tree Diseases
Source: MDPI journal article supplement (doi:10.3390/plants11243415), 2022-12-07
Supplement: s1 [file s1]

# Valorization of *Quercus suber* L. bark as a source of phytochemicals with antimicrobial activity against apple tree diseases

E. Sánchez-Hernández, V. González-García, J. Casanova-Gascón, J.J. Barriuso-Vargas, J. Balduque-Gil, B. Lorenzo-Vidal, J. Martín-Gil and P. Martín-Ramos

## SUPPLEMENTARY MATERIALS

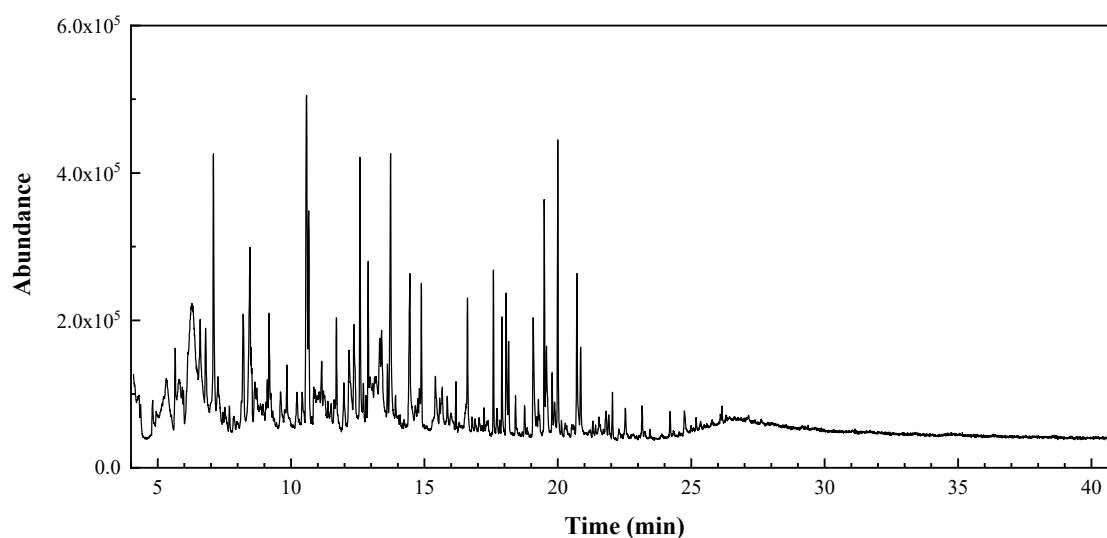

**Figure S1.** GC–MS chromatogram of *Q. suber* bark aqueous ammonia extract.

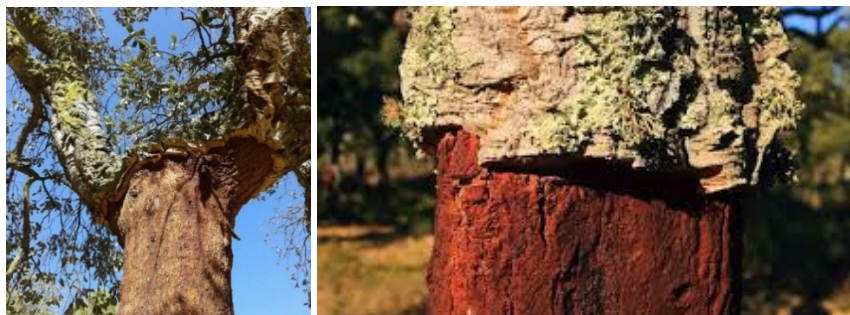

**Figure S2.** *Quercus suber* tree in Alcornocal de Valdegalindo, Foncastín, Valladolid, Spain

**Table S1.** Chemical species identified in *Q. suber* bark aqueous ammonia extract by GC–MS

| Peak | RT<br>(min) | Area<br>(%) | Assignment                                                                                                                                             |
|------|-------------|-------------|--------------------------------------------------------------------------------------------------------------------------------------------------------|
| 2    | 4.8108      | 0.4872      | 1H-Imidazole, 4,5-dihydro-2-methyl-                                                                                                                    |
| 4    | 4.9474      | 0.5323      | Diethyl carbonate                                                                                                                                      |
| 5    | 5.1670      | 0.8387      | Methane, chloromethoxy-                                                                                                                                |
| 6    | 5.2204      | 0.5830      | 1-Methoxy-2-methyl-3-butene                                                                                                                            |
| 7    | 5.3272      | 2.1353      | 2-Furancarboxaldehyde, 5-methyl-                                                                                                                       |
| 8    | 5.6596      | 1.0150      | Hexanoic acid                                                                                                                                          |
| 12   | 5.9682      | 0.3642      | 3-Cyclobutene-1,2-dione, 3,4-dihydroxy-                                                                                                                |
| 13   | 6.1403      | 1.3106      | 4-Hydroxy-3-[[1,3-dihydroxy-2-propoxy]methyl]-1H-pyrazole-5-carboxamide                                                                                |
| 14   | 6.2887      | 3.8163      | Glycerin                                                                                                                                               |
| 15   | 6.3184      | 3.8476      | Glycerin                                                                                                                                               |
| 16   | 6.5974      | 3.0940      | 4-Hydroxy-3-[[1,3-dihydroxy-2-propoxy]methyl]-1H-pyrazole-5-carboxamide; 3(5)-[[1,2-Dihydroxy-3-propoxy]methyl]-4-hydroxy-1H-pyrazole-5(3)-carboxamide |
| 17   | 6.7992      | 1.9123      | $\alpha$ -Amino- $\gamma$ -butyrolactone                                                                                                               |
| 18   | 7.0900      | 3.5795      | 2-Azabicyclo[2.2.1]heptane                                                                                                                             |
| 27   | 8.4611      | 2.7350      | Benzoic acid                                                                                                                                           |
| 28   | 8.5026      | 0.5628      | Octanoic acid                                                                                                                                          |
| 29   | 8.5323      | 0.3783      | $\alpha$ -pyrone-6-carboxylic acid                                                                                                                     |
| 30   | 8.6450      | 0.8336      | $\alpha$ -D-Mannopyranoside, methyl 3,6-anhydro-                                                                                                       |
| 33   | 9.1080      | 0.4768      | Dianhydromannitol                                                                                                                                      |
| 34   | 9.1733      | 1.1565      | Benzofuran, 2,3-dihydro-                                                                                                                               |
| 36   | 9.6066      | 0.7592      | Acetamide, N,N'-thiobis-                                                                                                                               |
| 39   | 9.8440      | 0.8848      | Nonanoic acid                                                                                                                                          |
| 40   | 10.2238     | 0.5838      | 5-Nitro-3-cyano-2(1H)-pyridone                                                                                                                         |
| 41   | 10.4197     | 0.6269      | Cycloserine                                                                                                                                            |
| 44   | 10.8530     | 0.4125      | Benzamide                                                                                                                                              |
| 45   | 10.9005     | 0.4053      | Benzamide                                                                                                                                              |
| 46   | 10.9835     | 0.5358      | $\alpha$ -D-Xylofuranoside, methyl                                                                                                                     |
| 48   | 11.1497     | 0.8553      | Octane, 1-(ethenylthio)-                                                                                                                               |
| 49   | 11.2150     | 0.4622      | Benzaldehyde, 4-hydroxy-                                                                                                                               |
| 50   | 11.3812     | 0.3539      | 3-Amino-4,5-dihydro-3H-[1,4']bipyridinyl-2,6-dione                                                                                                     |
| 54   | 11.7017     | 0.9917      | Vanillin                                                                                                                                               |
| 55   | 11.9807     | 0.5968      | 2-Propenoic acid, 3-phenyl-                                                                                                                            |
| 56   | 12.1766     | 1.7044      | Heptanedioic acid                                                                                                                                      |
| 57   | 12.3546     | 1.6925      | Cyclohexane, 1,3-dimethyl-, trans-                                                                                                                     |
| 58   | 12.5861     | 2.2905      | 1-Decene                                                                                                                                               |
| 59   | 12.7107     | 0.4434      | Oxazole, 2,4-dimethyl-                                                                                                                                 |
| 60   | 12.8116     | 0.2830      | Apocynin                                                                                                                                               |
| 62   | 12.9659     | 1.0154      | Propanoic acid, 3-hydroxy-                                                                                                                             |
| 63   | 13.0609     | 0.4724      | Propanoic acid, 3-hydroxy-                                                                                                                             |
| 64   | 13.1440     | 0.5911      | Benzoic acid, 4-hydroxy-                                                                                                                               |
| 65   | 13.1855     | 0.9933      | Benzoic acid, 4-hydroxy-                                                                                                                               |
| 66   | 13.3280     | 1.3279      | Octanedioic acid                                                                                                                                       |
| 67   | 13.3933     | 1.7386      | 2,2'-Heptamethylene-di-2-imidazoline                                                                                                                   |
| 68   | 13.6188     | 0.5677      | Pentadecanoic acid                                                                                                                                     |
| 69   | 13.7316     | 3.3262      | Benzoic acid, 4-hydroxy-3-methoxy-                                                                                                                     |
| 70   | 13.9156     | 0.4026      | Nonanedioic acid, monomethyl ester                                                                                                                     |
| 71   | 14.4557     | 2.1617      | Azelaic acid (or nonanodioic acid)                                                                                                                     |
| 72   | 14.6575     | 0.3131      | 3-(Ethyl-hydrazono)-butan-2-one                                                                                                                        |
| 74   | 14.8118     | 0.3921      | 2-Propenamide, 3-phenyl-                                                                                                                               |
| 75   | 14.8831     | 1.0172      | N-(Trifluoroacetyl)-N,O,O',O''-tetrakis(trimethylsilyl)norepinephrine                                                                                  |
| 77   | 15.4113     | 0.9514      | 2H-Pyran-2-one, tetrahydro-4-hydroxy-6-pentyl-                                                                                                         |
| 79   | 15.6665     | 0.8425      | Benzaldehyde, 3,4,5-trimethoxy-                                                                                                                        |
| 80   | 15.8565     | 0.3840      | Trehalose                                                                                                                                              |
| 81   | 15.9930     | 0.4175      | Thiazolo[5,4-d]pyrimidine, 5-methyl-                                                                                                                   |
| 82   | 16.1829     | 0.3554      | Cyclooctane, 1,2-dimethyl-                                                                                                                             |

|     |         |        |                                                    |
|-----|---------|--------|----------------------------------------------------|
| 86  | 17.0494 | 0.2255 | 2-Propenoic acid, 3-(4-hydroxy-3-methoxyphenyl)-   |
| 88  | 17.5836 | 1.0127 | Hexadecanoic acid, methyl ester                    |
| 89  | 17.7261 | 0.2740 | 1-Tetradecene                                      |
| 91  | 17.9041 | 0.8591 | n-Hexadecanoic acid                                |
| 92  | 18.0644 | 1.3185 | Scopoletin                                         |
| 94  | 18.4145 | 0.3436 | Cycloheptadecanone                                 |
| 95  | 18.7588 | 0.2692 | Benzonitrile, 4-(2-chlorobenzylidenamino)-         |
| 96  | 19.0793 | 1.4995 | Acetic acid, 3,7,11,15-tetramethyl-hexadecyl ester |
| 98  | 19.2752 | 0.3104 | trans-3,4-Dimethoxy-2-ethoxy-.beta.-methylstyrene  |
| 100 | 19.4948 | 1.6066 | Methyl stearate                                    |
| 102 | 19.7856 | 0.4921 | Octadecanoic acid                                  |
| 104 | 19.9993 | 2.2008 | Cyclopentadecane                                   |
| 108 | 20.7174 | 1.5143 | Octadecanedioic acid                               |

---

**Table S2.** Examples of antimicrobial activity reported in the literature for other natural products rich in glycerin, vanillic acid, and azabicyclo derivatives.

| Phytochemical          | Plant                                                                  | Microorganism                      | Effectiveness                                         | Ref. |
|------------------------|------------------------------------------------------------------------|------------------------------------|-------------------------------------------------------|------|
| Glycerin               | <i>Cynodon dactylon</i>                                                | <i>Streptococcus pyogenes</i>      | IZ = 18 mm                                            | [1]  |
|                        |                                                                        | <i>Staphylococcus aureus</i>       | IZ = 30 mm                                            |      |
|                        |                                                                        | <i>Escherichia coli</i>            | IZ = 25 mm                                            |      |
|                        |                                                                        | <i>Proteus mirabilis</i>           | IZ = 23 mm                                            |      |
|                        |                                                                        | <i>Salmonella typhi</i>            | IZ = 11 mm                                            |      |
|                        | <i>Salvadora persica</i>                                               | <i>S. aureus</i>                   | IZ = 6.635 mm                                         | [2]  |
|                        |                                                                        | <i>Aspergillus terreus</i>         | IZ = 6.77 mm                                          |      |
|                        | <i>Aphelandra squarrosa</i>                                            | <i>E. coli</i>                     | IZ = 14 mm                                            | [3]  |
|                        | <i>Casuarina equisetifolia</i> leaves                                  | <i>E. coli</i>                     | MIC = 25,000-100,000 $\mu\text{g}\cdot\text{mL}^{-1}$ | [4]  |
|                        |                                                                        | <i>Klebsiella pneumoniae</i>       | MIC = 25,000-50,000 $\mu\text{g}\cdot\text{mL}^{-1}$  |      |
|                        |                                                                        | <i>P. aeruginosa</i>               | MIC = 50,000 $\mu\text{g}\cdot\text{mL}^{-1}$         |      |
|                        |                                                                        | <i>Bacillus subtilis</i>           | MIC = 50,000-150,000 $\mu\text{g}\cdot\text{mL}^{-1}$ |      |
|                        |                                                                        | <i>S. aureus</i>                   | MIC = 25,000-100,000 $\mu\text{g}\cdot\text{mL}^{-1}$ |      |
| Vanillic acid          | <i>Onosma hispidum</i> root bark, 500 $\mu\text{g}\cdot\text{mL}^{-1}$ | <i>Micrococcus</i>                 | MIC = 50,000-150,000 $\mu\text{g}\cdot\text{mL}^{-1}$ | [5]  |
|                        |                                                                        | <i>B. subtilis</i>                 | n.a.                                                  |      |
|                        |                                                                        | <i>Corynebacterium diphtheriae</i> | IZ = 20 mm                                            |      |
|                        |                                                                        | <i>C. diphtheriticum</i>           | IZ = 19-20 mm                                         |      |
|                        |                                                                        | <i>M. lysodieticus</i>             | IZ = 20 mm                                            |      |
|                        |                                                                        | <i>S. aureus</i>                   | IZ = 19-20 mm                                         |      |
|                        |                                                                        | <i>S. epidermidis</i>              | IZ = 20 mm                                            |      |
|                        |                                                                        | <i>S. saprophyticus</i>            | IZ = 17-18 mm                                         |      |
|                        |                                                                        | <i>Enterococcus faecalis</i>       | IZ = 20 mm                                            |      |
|                        |                                                                        | <i>E. faecalis</i> 2400            | IZ = 18 mm                                            |      |
|                        |                                                                        | <i>E. faecium</i>                  | IZ = 18 mm                                            |      |
|                        |                                                                        | <i>Streptococcus pneumoniae</i>    | IZ = 20 mm                                            |      |
|                        |                                                                        | <i>S. pyogenes</i>                 | IZ = 18-20 mm                                         |      |
|                        |                                                                        | <i>E. coli</i> WT                  | n.a.                                                  |      |
|                        |                                                                        | <i>E. coli</i> BU40                | n.a.                                                  |      |
|                        |                                                                        | <i>E. coli</i> FPL5014             | n.a.                                                  |      |
|                        |                                                                        | <i>K. pneumoniae</i>               | n.a.                                                  |      |
|                        |                                                                        | <i>P. mirabilis</i>                | n.a.                                                  |      |
|                        |                                                                        | <i>P. aeruginosa</i> PAO286        | n.a.                                                  |      |
|                        |                                                                        | <i>S. typhi</i>                    | n.a.                                                  |      |
|                        |                                                                        | <i>S. paratyphi</i> A              | n.a.                                                  |      |
|                        |                                                                        | <i>S. paratyphi</i> B              | n.a.                                                  |      |
|                        |                                                                        | <i>Shigella dysenteriae</i>        | n.a.                                                  |      |
|                        |                                                                        | <i>S. sonnei</i>                   | n.a.                                                  |      |
|                        |                                                                        | <i>S. flexneriae</i>               | n.a.                                                  |      |
|                        | <i>Ruta chalepensis</i> stems                                          | <i>S. aureus</i> ATCC 25923        | IZ = 14.7-16.3 mm                                     | [6]  |
|                        |                                                                        | <i>E. coli</i> ATCC 35218          | IZ = 13.3-17.3 mm                                     |      |
|                        |                                                                        | <i>P. aeruginosa</i> ATCC 27853    | IZ = 7.7-17.7 mm                                      |      |
|                        | <i>R. chalepensis</i> leaves                                           | <i>S. aureus</i> ATCC 25923        | IZ = 12.3-15.3 mm                                     |      |
|                        |                                                                        | <i>E. coli</i> ATCC 35218          | IZ = 14.3-16.3 mm                                     |      |
|                        |                                                                        | <i>P. aeruginosa</i> ATCC 27853    | IZ = 9.7-16.7 mm                                      |      |
|                        | <i>R. chalepensis</i> flowers                                          | <i>S. aureus</i> ATCC 25923        | IZ = 15-16 mm                                         |      |
|                        |                                                                        | <i>E. coli</i> ATCC 35218          | IZ = 13-15.7 mm                                       |      |
|                        |                                                                        | <i>P. aeruginosa</i> ATCC 27853    | IZ = 15-16.3 mm                                       |      |
| Azabicyclo derivatives | <i>Pinus pinaster</i> bark                                             | <i>Acinetobacter baumannii</i>     | MIC = 200,000 $\mu\text{g}\cdot\text{mL}^{-1}$        | [7]  |
|                        | <i>Azadirachta indica</i> + <i>Ocimum sanctum</i> leaves               | <i>Aeromonas hydrophila</i>        | MIC = 3200 $\mu\text{g}\cdot\text{mL}^{-1}$           | [8]  |
|                        |                                                                        | <i>S. aureus</i>                   | MIC = 3460 $\mu\text{g}\cdot\text{mL}^{-1}$           |      |
|                        |                                                                        | <i>S. epidermidis</i>              | MIC = 4200 $\mu\text{g}\cdot\text{mL}^{-1}$           |      |
|                        |                                                                        | <i>P. aeruginosa</i>               | MIC = 4820 $\mu\text{g}\cdot\text{mL}^{-1}$           |      |
|                        |                                                                        | <i>Vibrio harveyi</i>              | MIC = 3750 $\mu\text{g}\cdot\text{mL}^{-1}$           |      |

|                                                                      |                             |                                             |      |
|----------------------------------------------------------------------|-----------------------------|---------------------------------------------|------|
|                                                                      | <i>V. vulnificus</i>        | MIC = 4460 $\mu\text{g}\cdot\text{mL}^{-1}$ |      |
| <i>Melia dubia</i>                                                   | <i>E. coli</i>              | IZ = 16 mm                                  | [9]  |
| leaves, 50<br>$\mu\text{g}\cdot\text{mL}^{-1}$                       | <i>S. aureus</i>            | IZ = 15mm                                   |      |
| <i>Dioscorea</i>                                                     | <i>S. aureus</i> ATCC 25923 | IZ > 6-8 mm                                 | [10] |
| <i>hispidia</i> tuber,<br>50,000<br>$\mu\text{g}\cdot\text{mL}^{-1}$ | <i>E.coli</i> ATCC 25922    | IZ > 6 mm                                   |      |

IZ: inhibition zone; MIC: Minimum Inhibitory Concentration; n.a.: not activity.

**Table S3.** Inhibition values reported in the literature for *Q. suber* extracts against pathogenic microorganisms.

| Collection site      | Part of the plant | Solvent                                              | Microorganisms                              | Effectiveness                    | Ref. |
|----------------------|-------------------|------------------------------------------------------|---------------------------------------------|----------------------------------|------|
| Jijel<br>Algeria     | Acorn             | Acetone<br>(70%)                                     | <i>Candida albicans</i>                     | MIC = 105 µg·mL <sup>-1</sup>    | [11] |
|                      |                   |                                                      | <i>C. krusei</i>                            | MIC = 100 µg·mL <sup>-1</sup>    |      |
|                      |                   |                                                      | <i>C. guilliermondii</i>                    | MIC = 80 µg·mL <sup>-1</sup>     |      |
|                      |                   |                                                      | <i>Trichophyton verrucosum</i>              | MIC = 20 µg·mL <sup>-1</sup>     |      |
|                      |                   |                                                      | <i>T. mentagrophytes</i>                    | MIC = 20 µg·mL <sup>-1</sup>     |      |
|                      |                   |                                                      | <i>Epidermophyton floccosum</i>             | MIC = 45 µg·mL <sup>-1</sup>     |      |
|                      |                   |                                                      | <i>Aspergillus flavus</i>                   | MIC = 60 µg·mL <sup>-1</sup>     |      |
| Bejaia,<br>Algeria   | Bark              | Methanol:water<br>(1:1),<br>3000 µg·mL <sup>-1</sup> | <i>Staphylococcus aureus</i> ATCC<br>25923  | IZ = 12.1±0.5 mm                 | [12] |
|                      |                   |                                                      | <i>Listeria innocua</i> CLIP<br>74915       | n.a.                             |      |
|                      |                   |                                                      | <i>Escherichia coli</i> ATCC 25922          | n.a.                             |      |
|                      |                   |                                                      | <i>Pseudomonas aeruginosa</i> ATCC<br>27853 | IZ =10.07±0.1 mm                 |      |
| Rabat,<br>Morocco    | Bark              | Methanol                                             | <i>C. albicans</i> L13 (IHEM 15835)         | MIC = 25,000 µg·mL <sup>-1</sup> | [13] |
|                      |                   |                                                      | <i>C. albicans</i> L2 (IHEM 15824)          | MIC = 25,000 µg·mL <sup>-1</sup> |      |
|                      |                   |                                                      | <i>C. albicans</i> L5 (IHEM 15827)          | MIC = 25,000 µg·mL <sup>-1</sup> |      |
|                      |                   |                                                      | <i>C. albicans</i> L14 (IHEM 15836)         | MIC = 12,500 µg·mL <sup>-1</sup> |      |
|                      |                   |                                                      | <i>C. albicans</i> L12 (IHEM 15834)         | MIC = 50,000 µg·mL <sup>-1</sup> |      |
| n.s.                 | Bark              | Methanol                                             | <i>T. rubrum</i> M143                       | MIC = 50,000 µg·mL <sup>-1</sup> | [14] |
|                      |                   |                                                      | <i>C. albicans</i> L5                       | MIC = 12,500 µg·mL <sup>-1</sup> |      |
|                      | Leaf              |                                                      | <i>T. rubrum</i> M143                       | MIC = 50,000 µg·mL <sup>-1</sup> |      |
|                      |                   |                                                      | <i>C. albicans</i> L5                       | MIC = 50,000 µg·mL <sup>-1</sup> |      |
| Tamil Nadu,<br>India | Leaf              | Methanol,<br>120 µg·mL <sup>-1</sup>                 | <i>Bacillus subtilis</i>                    | IZ = 12 mm                       | [15] |
|                      |                   |                                                      | <i>E. coli</i>                              | IZ = 13 mm                       |      |
|                      |                   |                                                      | <i>Streptococcus pneumoniae</i>             | IZ = 11 mm                       |      |
|                      |                   |                                                      | <i>S. aureus</i>                            | IZ = 12 mm                       |      |
|                      |                   |                                                      | <i>A. niger</i>                             | IZ = 14 mm                       |      |
|                      |                   |                                                      | <i>Penicillium</i> sp                       | IZ = 12 mm                       |      |
|                      |                   |                                                      | <i>Fusarium oxysporum</i>                   | IZ = 15 mm                       |      |
|                      | Stem              |                                                      | <i>B. subtilis</i>                          | IZ = 12 mm                       |      |
|                      |                   |                                                      | <i>E. coli</i>                              | IZ = 25 mm                       |      |
|                      |                   |                                                      | <i>S. pneumonia</i>                         | IZ = 15 mm                       |      |
|                      |                   |                                                      | <i>S. aureus</i>                            | IZ = 16 mm                       |      |
|                      |                   |                                                      | <i>Aspergillus niger</i>                    | IZ = 14 mm                       |      |
|                      |                   |                                                      | <i>Penicillium</i> sp                       | IZ = 14 mm                       |      |
|                      |                   |                                                      | <i>F. oxysporum</i>                         | IZ = 20 mm                       |      |

IZ: inhibition zone; MIC: Minimum Inhibitory Concentration; n.a.: no activity at the highest concentration tested; n.s.: not specified

**Table S4.** Inhibitory values reported in the literature for bioactive natural substances against the pathogens under study.

| Pathogen                    | Source/Solvent extraction                                     | Natural Product                                       | Inhibitory Value                                          | Ref.      |
|-----------------------------|---------------------------------------------------------------|-------------------------------------------------------|-----------------------------------------------------------|-----------|
| <i>Monilinia fructigena</i> | Aqueous ammonia extract (1:1)                                 | <i>Quercus suber</i> bark extract                     | MIC = 1500 $\mu\text{g}\cdot\text{mL}^{-1}$               | This work |
|                             |                                                               | COS- <i>Q. suber</i> bark                             | MIC = 1000 $\mu\text{g}\cdot\text{mL}^{-1}$               |           |
|                             | Commercial EOs                                                | <i>Mentha pulegium</i> leaves and flowers             | EC <sub>50</sub> = 18.87 $\mu\text{L}\cdot\text{mL}^{-1}$ | [16]      |
|                             |                                                               | <i>Eucalyptus radiata</i> flowers                     | EC <sub>50</sub> = 15.34 $\mu\text{L}\cdot\text{mL}^{-1}$ |           |
|                             |                                                               | <i>Lavandula angustifolia</i> leaves and flowers      | EC <sub>50</sub> = 21.28 $\mu\text{L}\cdot\text{mL}^{-1}$ |           |
|                             |                                                               | <i>Origanum compactum</i> leaves and flowers          | EC <sub>50</sub> = 17.75 $\mu\text{L}\cdot\text{mL}^{-1}$ |           |
|                             |                                                               | <i>Rosmarinus officinalis</i> leaves and flowers      | EC <sub>50</sub> = 16.79 $\mu\text{L}\cdot\text{mL}^{-1}$ |           |
|                             |                                                               | <i>Syzygium aromaticum</i> flowers buds               | EC <sub>50</sub> = 10.09 $\mu\text{L}\cdot\text{mL}^{-1}$ |           |
|                             |                                                               | <i>Thymus vulgaris</i> leaves and flowers             | EC <sub>50</sub> = 12.52 $\mu\text{L}\cdot\text{mL}^{-1}$ |           |
|                             |                                                               | <i>Citrus aurantium</i> L. ssp. <i>amara</i> blossoms | EC <sub>50</sub> = 10.36 $\mu\text{L}\cdot\text{mL}^{-1}$ |           |
|                             |                                                               | <i>C. sinensis</i> peel                               | EC <sub>50</sub> = 11.19 $\mu\text{L}\cdot\text{mL}^{-1}$ |           |
|                             | n-hexane                                                      | <i>Dittrichia viscosa</i> young shoots                | MIC = 200 $\mu\text{g}\cdot\text{mL}^{-1}$                | [17]      |
|                             |                                                               | <i>Ferula communis</i> aerial part                    | MIC > 400 $\mu\text{g}\cdot\text{mL}^{-1}$                |           |
|                             |                                                               | <i>F. communis</i> root                               | MIC = 400 $\mu\text{g}\cdot\text{mL}^{-1}$                |           |
|                             | Methanol or n-hexane                                          | <i>Prunus laurocerasus</i> fruits                     | MIC > 1000 $\mu\text{g}\cdot\text{mL}^{-1}$               | [18]      |
|                             |                                                               | <i>P. laurocerasus</i> leaves                         | MIC > 1000 $\mu\text{g}\cdot\text{mL}^{-1}$               |           |
|                             |                                                               | <i>Cornus mas</i> fruits                              | MIC > 1000 $\mu\text{g}\cdot\text{mL}^{-1}$               |           |
|                             |                                                               | <i>C. mas</i> leaves                                  | MIC > 1000 $\mu\text{g}\cdot\text{mL}^{-1}$               |           |
|                             |                                                               | <i>C. mas</i> fruits seeds                            | MIC > 1000 $\mu\text{g}\cdot\text{mL}^{-1}$               |           |
|                             |                                                               | <i>Morus nigra</i> immature fruits                    | MIC > 1000 $\mu\text{g}\cdot\text{mL}^{-1}$               |           |
|                             |                                                               | <i>M. nigra</i> leaves                                | MIC > 1000 $\mu\text{g}\cdot\text{mL}^{-1}$               |           |
|                             |                                                               | <i>M. alba</i> immature fruits                        | MIC > 1000 $\mu\text{g}\cdot\text{mL}^{-1}$               |           |
|                             |                                                               | <i>M. alba</i> leaves                                 | MIC > 1000 $\mu\text{g}\cdot\text{mL}^{-1}$               |           |
|                             |                                                               | <i>Rosa canina</i> fruits                             | MIC > 1000 $\mu\text{g}\cdot\text{mL}^{-1}$               |           |
|                             | Water                                                         | <i>Punica granatum</i> peel                           | MIC = 50,000 $\mu\text{g}\cdot\text{mL}^{-1}$             | [19]      |
|                             | Ethyl alcohol (96 %) (2000 $\mu\text{g}\cdot\text{mL}^{-1}$ ) | <i>Salix alba</i> bark                                | IR = 20%                                                  | [20]      |
|                             |                                                               | <i>S. alba</i> leaves                                 | n.a.                                                      |           |
|                             |                                                               | <i>Equisetum arvense</i>                              | n.a.                                                      |           |
|                             |                                                               | <i>Artemisia absinthium</i> aerial parts              | IR = 20%                                                  |           |
|                             |                                                               | <i>A. vulgaris</i> aerial parts                       | IR = 30%                                                  |           |
| <i>M. laxa</i>              | Aqueous ammonia extract (1:1)                                 | <i>Q. suber</i> bark extract                          | MIC = 1500 $\mu\text{g}\cdot\text{mL}^{-1}$               | This work |
|                             |                                                               | COS- <i>Q. suber</i> bark                             | MIC = 750 $\mu\text{g}\cdot\text{mL}^{-1}$                |           |
|                             | Commercial EOs                                                | <i>M. pulegium</i> leaves and flowers                 | EC <sub>50</sub> = 21.43 $\mu\text{L}\cdot\text{mL}^{-1}$ | [16]      |
|                             |                                                               | <i>E. radiata</i> flowers                             | EC <sub>50</sub> = 20.80 $\mu\text{L}\cdot\text{mL}^{-1}$ |           |
|                             |                                                               | <i>L. angustifolia</i> leaves and flowers             | EC <sub>50</sub> = 21.23 $\mu\text{L}\cdot\text{mL}^{-1}$ |           |
|                             |                                                               | <i>O. compactum</i> leaves and flowers                | EC <sub>50</sub> = 20.20 $\mu\text{L}\cdot\text{mL}^{-1}$ |           |
|                             |                                                               | <i>R. officinalis</i> leaves and flowers              | EC <sub>50</sub> = 17.30 $\mu\text{L}\cdot\text{mL}^{-1}$ |           |
|                             |                                                               | <i>S. aromaticum</i> flowers buds                     | EC <sub>50</sub> = 6.74 $\mu\text{L}\cdot\text{mL}^{-1}$  |           |
|                             |                                                               | <i>T. vulgaris</i> leaves and flowers                 | EC <sub>50</sub> = 14.38 $\mu\text{L}\cdot\text{mL}^{-1}$ |           |

|                     |                                                  |                                                  |                                              |           |
|---------------------|--------------------------------------------------|--------------------------------------------------|----------------------------------------------|-----------|
|                     | n-hexane                                         | <i>C. aurantium</i> subsp. <i>amara</i> blossoms | EC <sub>50</sub> = 10.96 µL·mL <sup>-1</sup> | [17]      |
|                     |                                                  | <i>C. sinensis</i> peel                          | EC <sub>50</sub> = 11.52 µL·mL <sup>-1</sup> |           |
|                     |                                                  | <i>D. viscosa</i> young shoots                   | MIC = 200 µg·mL <sup>-1</sup>                |           |
|                     |                                                  | <i>F. communis</i> aerial part                   | MIC > 400 µg·mL <sup>-1</sup>                |           |
|                     |                                                  | <i>F. communis</i> root                          | MIC = 400 µg·mL <sup>-1</sup>                |           |
|                     | Water                                            | <i>P. granatum</i> peel                          | MIC > 50,000 µg·mL <sup>-1</sup>             | [19]      |
|                     | Ethyl alcohol (2000 µg·mL <sup>-1</sup> )        | <i>S. alba</i> bark                              | IR = 20%                                     | [20]      |
|                     |                                                  | <i>S. alba</i> leaves                            | IR = 0%                                      |           |
|                     |                                                  | <i>E. arvense</i>                                | IR = 0%                                      |           |
|                     |                                                  | <i>A. absinthium</i> aerial parts                | IR = 22%                                     |           |
|                     |                                                  | <i>A. vulgaris</i> aerial parts                  | IR = 22%                                     |           |
| <i>N. parvum</i>    | Aqueous ammonia (1:1)                            | <i>Q. suber</i> bark extract                     | MIC > 1500 µg·mL <sup>-1</sup>               | This work |
|                     |                                                  | COS- <i>Q. suber</i> bark                        | MIC = 750 µg·mL <sup>-1</sup>                |           |
|                     | Water                                            | <i>E. arvense</i>                                | MIC > 1500 µg·mL <sup>-1</sup>               | [21]      |
|                     |                                                  | <i>Urtica dioica</i>                             | MIC > 1500 µg·mL <sup>-1</sup>               |           |
|                     | Methanol:water (1:1)                             | <i>Silybum marianum</i> capitula                 | MIC > 1500 µg·mL <sup>-1</sup>               | [22]      |
|                     | Methanol:water (1:1)                             | <i>Rubia tinctorum</i> roots                     | MIC = 250 µg·mL <sup>-1</sup>                | [23]      |
| <i>P. cactorum</i>  | Aqueous ammonia extract (1:1)                    | <i>Q. suber</i> bark extract                     | MIC = 750 µg·mL <sup>-1</sup>                | This work |
|                     |                                                  | COS- <i>Q. suber</i> bark                        | MIC = 375 µg·mL <sup>-1</sup>                |           |
|                     | Aqueous ammonia extract (1:1)                    | <i>Uncaria tomentosa</i> bark                    | MIC = 187.5 µg·mL <sup>-1</sup>              | [24]      |
|                     |                                                  | COS- <i>U. tomentosa</i>                         | MIC = 39.05 µg·mL <sup>-1</sup>              |           |
|                     | Commercial product                               | <i>Allium</i> -based extract                     | MIC = 100 µg·mL <sup>-1</sup>                | [25]      |
|                     |                                                  | <i>Origanum heracleoticum</i> inflorescences     | MIC > 500,000 µg·mL <sup>-1</sup>            |           |
|                     |                                                  | <i>S. officinalis</i> leaves                     | MIC > 500,000 µg·mL <sup>-1</sup>            |           |
|                     | Water extract                                    | <i>R. officinalis</i> leaves and flowers         | MIC > 500,000 µg·mL <sup>-1</sup>            | [26]      |
|                     |                                                  | <i>Pinus sylvestris</i> bark                     | MIC = 100 µg·mL <sup>-1</sup>                |           |
|                     |                                                  | <i>P. abies</i> bark                             | MIC = 100 µg·mL <sup>-1</sup>                |           |
|                     | Ethanol 96 %                                     | <i>Eucalyptus. citriodora</i>                    | MIC > 28,000 µg·mL <sup>-1</sup>             | [28]      |
|                     |                                                  | <i>Melaleuca quinquenervia</i>                   | MIC > 28,000 µg·mL <sup>-1</sup>             |           |
|                     |                                                  | <i>Leptospermum pertersonii</i>                  | MIC > 28,000 µg·mL <sup>-1</sup>             |           |
| <i>E. amylovora</i> | Commercial EOs                                   | <i>Polylepis racemosa</i>                        | MIC > 28,000 µg·mL <sup>-1</sup>             | [29]      |
|                     |                                                  | <i>Junierus oxycedrus</i>                        | MIC > 28,000 µg·mL <sup>-1</sup>             |           |
|                     |                                                  | <i>Cymbopogon nardus</i>                         | MIC > 28,000 µg·mL <sup>-1</sup>             |           |
|                     |                                                  | <i>Pelargonium graveolens</i>                    | MIC = 28,000 µg·mL <sup>-1</sup>             |           |
|                     |                                                  | <i>Cuminum cyminum</i>                           | MIC > 28,000 µg·mL <sup>-1</sup>             |           |
|                     |                                                  | <i>Myrristica fragrans</i>                       | MIC > 28,000 µg·mL <sup>-1</sup>             |           |
|                     |                                                  | <i>C. martini</i>                                | MIC = 28,000 µg·mL <sup>-1</sup>             |           |
|                     |                                                  | <i>M. pulegium</i>                               | n.a.                                         |           |
|                     |                                                  | <i>M. spicata</i>                                | n.a.                                         |           |
|                     |                                                  | <i>T. vulgaris</i>                               | MIC = 14,000 µg·mL <sup>-1</sup>             |           |
|                     | Aqueous ammonia (1:1)                            | <i>Q. suber</i> bark extract                     | MIC = 1000 µg·mL <sup>-1</sup>               | This work |
|                     |                                                  | COS- <i>Q. suber</i> bark                        | MIC = 750 µg·mL <sup>-1</sup>                |           |
|                     | Water                                            |                                                  | MIC > 2000 µg·mL <sup>-1</sup>               | [30]      |
|                     | Hydroalcoholic extraction (ethanol:water, 70:30) | <i>Moringa oleifera</i> leaves                   | MIC = 1000 µg·mL <sup>-1</sup>               |           |
|                     | Methanol extraction                              |                                                  | MIC = 1000 µg·mL <sup>-1</sup>               |           |



|                                                  |                                                                   |                                            |                                       |      |
|--------------------------------------------------|-------------------------------------------------------------------|--------------------------------------------|---------------------------------------|------|
| <i>P.<br/>syringae</i><br>pv.<br><i>syringae</i> | Water extract +<br>Maltodextrins                                  |                                            | MIC > 2000 µg·mL <sup>-1</sup>        |      |
|                                                  | Hydroalcoholic<br>extract with<br>maltodextrins<br>(50 % ethanol) |                                            | MIC = 1000 µg·mL <sup>-1</sup>        |      |
|                                                  | Methanol/water<br>(1:1, v/v)                                      | <i>P. granatum</i> var. <i>nana</i> fruits | MIC = 1500 µg·mL <sup>-1</sup>        | [31] |
|                                                  | Methanol/water<br>(1:1, v/v)                                      | <i>Hibiscus syriacus</i> flowers           | MIC = 750 µg·mL <sup>-1</sup>         | [32] |
|                                                  |                                                                   | <i>H. syriacus</i> leaves                  | MIC = 1000 µg·mL <sup>-1</sup>        |      |
|                                                  | Methanol/water<br>(1:1, v/v)                                      | <i>Limonium binervosum</i><br>flowers      | MIC = 1500 µg·mL <sup>-1</sup>        | [33] |
|                                                  |                                                                   | <i>L. binervosum</i> leaves                | MIC = 1500 µg·mL <sup>-1</sup>        |      |
|                                                  | Aqueous<br>ammonia (1:1)                                          | <i>Q. suber</i> bark extract               | MIC = 750 µg·mL <sup>-1</sup>         |      |
|                                                  |                                                                   | COS- <i>Q. suber</i> bark                  | MIC = 375 µg·mL <sup>-1</sup>         |      |
|                                                  |                                                                   | <i>Allium sativum</i> leaves               | IZ = 19.5-23.4 mm                     |      |
|                                                  | Ethanol,<br>10,000 µg·mL <sup>-1</sup>                            | <i>Azadirachta indica</i> leaves           | IZ = 15.5-18.2 mm                     | [34] |
|                                                  |                                                                   | <i>A. cepa</i> leaves                      | IZ = 13.2-14.6 mm                     |      |
|                                                  |                                                                   | <i>Ficus carica</i> leaves                 | IZ = 10.2-12.4 mm                     |      |
|                                                  |                                                                   | <i>M. oleifera</i> leaves                  | IZ = 17.25-24.4 mm                    |      |
|                                                  |                                                                   | <i>Psidium guajava</i> leaves              | IZ = 8.1-9.9 mm                       |      |
|                                                  | Commercial<br>EO                                                  | <i>T. vulgaris</i> leaves                  | MIC = 1400 µg·mL <sup>-1</sup>        | [35] |
|                                                  |                                                                   | <i>O. vulgare</i> leaves                   | MIC = 5800 µg·mL <sup>-1</sup>        |      |
|                                                  | Commercial<br>EO                                                  | <i>R. officinalis</i> aerial parts         | MIC = 125 µg·mL <sup>-1</sup>         | [36] |
|                                                  |                                                                   | <i>T. daenensis</i> aerial parts           | MIC = 3.92-15.68 µg·mL <sup>-1</sup>  |      |
|                                                  |                                                                   | <i>Foeniculum vulgare</i><br>aerial parts  | MIC = 62.72-125 µg·mL <sup>-1</sup>   |      |
|                                                  |                                                                   | <i>M. spicata</i> aerial parts             | MIC = 31.36-62.72 µg·mL <sup>-1</sup> |      |
|                                                  |                                                                   | <i>M. piperita</i> aerial parts            | MIC = 62.72 µg·mL <sup>-1</sup>       |      |
|                                                  |                                                                   | <i>P. graveolens</i> aerial parts          | MIC = 62.72 µg·mL <sup>-1</sup>       |      |

IR: inhibition rate; IZ: inhibition zone diameter; MIC: Minimum Inhibitory Concentration; n.a.: not activity at the highest concentration tested; EC<sub>50</sub>: effective concentration 50%.

## References (reference numbers do not match those that appear in the main document)

1. Jatin R, R.; Priya R, S. Determination of bioactive components of *Cynodon dactylon* by GC-MS analysis & its in vitro antimicrobial activity. *International Journal of Pharmacy & Life Sciences* **2016**, 7, 4880-4885.
2. Hameed, R.H.; Mohammed, G.J.; Hameed, I.H. Characterization of antimicrobial metabolites produced by *Salvadora persica* and analysis of its chemical compounds using GC-MS and FTIR. *Indian Journal of Public Health Research & Development* **2018**, 9, 241, doi:10.5958/0976-5506.2018.00216.4.
3. Maria, K.K.; Joanna, G.K.; Katerina, A.D.; Leland, G.K. Chemical composition and antibacterial activity against *Escherichia coli* of extracts of a common household plant. *Journal of Medicinal Plants Research* **2021**, 15, 56-63, doi:10.5897/jmpr2020.7031.
4. Nehad, M.G.; Abdulrahman, S.H. Antimicrobial efficacy of *Casuarina equisetifolia* extracts against some pathogenic microorganisms. *Journal of Medicinal Plants Research* **2012**, 6, 5819-5825.
5. Naz, S.; Ahmad, S.; Ajaz Rasool, S.; Asad Sayeed, S.; Siddiqi, R. Antibacterial activity directed isolation of compounds from *Onosma hispidum*. *Microbiol. Res.* **2006**, 161, 43-48, doi:10.1016/j.micres.2005.05.001.
6. Ouerghemmi, I.; Bettaieb Rebey, I.; Rahali, F.Z.; Bourgou, S.; Pistelli, L.; Ksouri, R.; Marzouk, B.; Saidani Tounsi, M. Antioxidant and antimicrobial phenolic compounds from extracts of cultivated and wild-grown Tunisian *Ruta chalepensis*. *Journal of Food and Drug Analysis* **2017**, 25, 350-359, doi:10.1016/j.jfda.2016.04.001.
7. Ćurković-Perica, M.; Hrenović, J.; Kugler, N.; Goić-Barišić, I.; Tkalec, M. Antibacterial activity of *Pinus pinaster* bark extract and its components against multidrug-resistant clinical isolates of *Acinetobacter baumannii*. *Croat. Chem. Acta* **2015**, 88, 133-137, doi:10.5562/cca2548.
8. Harikrishnan, R.; Kim, M.-C.; Kim, J.-S.; Balasundaram, C.; Jawahar, S.; Heo, M.-S. Identification and antimicrobial activity of combined extract from *Azadirachta indica* and *Ocimum sanctum*. *Israeli Journal of Aquaculture - Bamidgah* **2010**, 62, 85-95.
9. Mudhafar, M.; Zainol, I.; Jaafar, C.; Alsailawi, H.; Majhool, A.A.; Alsaady, M. Phytochemical screening and characterization of *Melia dubia* leaves extract for antimicrobial activity against *Escherichia coli* and *Staphylococcus aureus*. *Indian Journal of Ecology* **2020**, 47, 493-496.
10. Suryowati, T.; Sirait, R.H.; Siagian, F.E.; Nursyam, M. Bioactive compound impacting the metabolism and antibacterial activity of gadung tuber (*Dioscorea hispida* Dennst). *Journal of Physics: Conference Series* **2020**, 1665, doi:10.1088/1742-6596/1665/1/012030.
11. Akroum, S. Antifungal activity of acetone extracts from *Punica granatum* L., *Quercus suber* L. and *Vicia faba* L. *Journal de Mycologie Médicale* **2017**, 27, 83-89, doi:10.1016/j.mycmed.2016.10.004.
12. Touati, R.; Santos, S.A.O.; Rocha, S.M.; Belhamel, K.; Silvestre, A.J.D. The potential of cork from *Quercus suber* L. grown in Algeria as a source of bioactive lipophilic and phenolic compounds. *Industrial Crops and Products* **2015**, 76, 936-945, doi:10.1016/j.indcrop.2015.07.074.
13. Lahlimi-Alami, Q.; Layachi, R.; Hassikou, R.; Benjelloun, J.; Amallah, L.; Guennoun, N.; Zaid, Y.; Bouzroud, S. Anticandidosis activity and acute toxicity of *Quercus suber* L. bark extracts. *Journal of Medicinal and Chemical Sciences* **2022**, 5, 769-778, doi:10.26655/jmchemsci.2022.5.11.
14. Hassikou, R.; Oulladi, H.; Arahou, M. Activité antimycosique des extraits du chêne-liège *Quercus suber* sur *Trichophyton rubrum* et *Candida albicans*. *Phytothérapie* **2014**, 12, 206-212, doi:10.1007/s10298-014-0874-2.
15. Subhashini, S.; Begum, S.M.; Rajesh, G. Antimicrobial characterisation combining spectrophotometric analysis of different oak species. *Int. J. Herb. Med* **2016**, 4, 32-35.
16. El Khetabi, A.; Ezrari, S.; El Ghadraoui, L.; Tahiri, A.; Ait Haddou, L.; Belabess, Z.; Merah, O.; Lahlali, R. In vitro and in vivo antifungal activities of nine commercial essential oils against brown rot in apples. *Horticulturae* **2021**, 7, 545, doi:10.3390/horticulturae7120545.
17. Mamoci, E.; Cavoski, I.; Simeone, V.; Mondelli, D.; Al-Bitar, L.; Caboni, P. Chemical composition and in vitro activity of plant extracts from *Ferula communis* and *Dittrichia viscosa* against postharvest fungi. *Molecules* **2011**, 16, 2609-2625, doi:10.3390/molecules16032609.
18. Onaran, A.; Yanar, Y. In vivo and in vitro antifungal activities of five plant extracts against various plant pathogens. *Egyptian Journal of Biological Pest Control* **2016**, 26, 405-411.
19. El Khetabi, A.; Lahlali, R.; Askarne, L.; Ezrari, S.; El Ghadaroui, L.; Tahiri, A.; Hrustić, J.; Amiri, S. Efficacy assessment of pomegranate peel aqueous extract for brown rot (*Monilinia* spp.) disease control. *Physiological and Molecular Plant Pathology* **2020**, 110, 101482, doi:10.1016/j.pmp.2020.101482.
20. Andreu, V.; Levert, A.; Amiot, A.; Cousin, A.; Aveline, N.; Bertrand, C. Chemical composition and antifungal activity of plant extracts traditionally used in organic and biodynamic farming.

21. Langa-Lomba, N.; Buzón-Durán, L.; Martín-Ramos, P.; Casanova-Gascón, J.; Martín-Gil, J.; Sánchez-Hernández, E.; González-García, V. Assessment of conjugate complexes of chitosan and *Urtica dioica* or *Equisetum arvense* extracts for the control of grapevine trunk pathogens. *Agronomy* **2021**, *11*, 976, doi:10.3390/agronomy11050976.
22. Langa-Lomba, N.; Buzón-Durán, L.; Sánchez-Hernández, E.; Martín-Ramos, P.; Casanova-Gascón, J.; Martín-Gil, J.; González-García, V. Antifungal activity against Botryosphaeriaceae fungi of the hydro-methanolic extract of *Silybum marianum* capitula conjugated with stevioside. *Plants* **2021**, *10*, 1363, doi:10.3390/plants10071363.
23. Langa-Lomba, N.; Sánchez-Hernández, E.; Buzón-Durán, L.; González-García, V.; Casanova-Gascón, J.; Martín-Gil, J.; Martín-Ramos, P. Activity of anthracenediones and flavoring phenols in hydromethanolic extracts of *Rubia tinctorum* against grapevine phytopathogenic fungi. *Plants* **2021**, *10*, 1527, doi:10.3390/plants10081527.
24. Sánchez-Hernández, E.; Martín-Ramos, P.; Martín-Gil, J.; Santiago-Aliste, A.; Hernández-Navarro, S.; Oliveira, R.; González-García, V. Bark extract of *Uncaria tomentosa* L. for the control of strawberry phytopathogens. *Horticulturae* **2022**, *8*, 672, doi:10.3390/horticulturae8080672.
25. Oladejo, O.; Imani, J. Inhibitory effect of CUSTOS, a formulated allium-based extract, on the growth of some selected plant pathogens. *International Journal of Plant Biology* **2022**, *13*, 44-54, doi:10.3390/ijpb13020006.
26. Salamone, A.; Zizzo, G.V.; Scarito, G. The antimicrobial activity of water extracts from Labiatae. *Acta Horticulturae* **2006**, 10.17660/ActaHortic.2006.723.67, 465-470, doi:10.17660/ActaHortic.2006.723.67.
27. Minova, S.; SešĶēna, R.; Voitkāne, S.; Metla, Z.; Daugavietis, M.; Jankevica, L. Impact of pine (*Pinus sylvestris* L.) and spruce (*Picea abies* (L.) Karst.) bark extracts on important strawberry pathogens. *Proceedings of the Latvian Academy of Sciences. Section B. Natural, Exact, and Applied Sciences*. **2015**, *69*, 62-67, doi:10.1515/prolas-2015-0008.
28. Lee, Y.-S.; Kim, J.; Shin, S.-C.; Lee, S.-G.; Park, I.-K. Antifungal activity of Myrtaceae essential oils and their components against three phytopathogenic fungi. *Flavour and Fragrance Journal* **2008**, *23*, 23-28, doi:10.1002/ffj.1850.
29. Kim, J.; Lee, Y.S.; Lee, S.G.; Shin, S.C.; Park, I.K. Fumigant antifungal activity of plant essential oils and components from West Indian bay (*Pimenta racemosa*) and thyme (*Thymus vulgaris*) oils against two phytopathogenic fungi. *Flavour and Fragrance Journal* **2008**, *23*, 272-277, doi:10.1002/ffj.1882.
30. Fontana, R.; Macchi, G.; Caproni, A.; Sicurella, M.; Buratto, M.; Salvatori, F.; Pappadà, M.; Manfredini, S.; Baldisserotto, A.; Marconi, P. Control of *Erwinia amylovora* growth by *Moringa oleifera* leaf extracts: *in vitro* and *in planta* effects. *Plants* **2022**, *11*, doi:10.3390/plants11070957.
31. Sánchez-Hernández, E.; Buzón-Durán, L.; Cuchí-Oterino, J.A.; Martín-Gil, J.; Lorenzo-Vidal, B.; Martín-Ramos, P. Dwarf pomegranate (*Punica granatum* L. var. *nana*): Source of 5-HMF and bioactive compounds with applications in the protection of woody crops. *Plants* **2022**, *11*, 550, doi:10.3390/plants11040550.
32. Sánchez-Hernández, E.; Buzón-Durán, L.; Lorenzo-Vidal, B.; Martín-Gil, J.; Martín-Ramos, P. Physicochemical characterization and antimicrobial activity against *Erwinia amylovora*, *Erwinia vitivora*, and *Diplodia seriata* of a light purple *Hibiscus syriacus* L. cultivar. *Plants* **2021**, *10*, 1876, doi:10.3390/plants10091876.
33. Sánchez-Hernández, E.; Buzón-Durán, L.; Langa-Lomba, N.; Casanova-Gascón, J.; Lorenzo-Vidal, B.; Martín-Gil, J.; Martín-Ramos, P. Characterization and antimicrobial activity of a halophyte from the Asturian coast (Spain): *Limonium binervosum* (G.E.Sm.) C.E.Salmon. *Plants* **2021**, *10*, 1852, doi:10.3390/plants10091852.
34. Islam, M.S.; Sultana, R.; Hasan, M.A.; Alam, M.S.; Sikdar, B.; Kamaruzzaman, M.; Islam, M.A. Characterization and biocontrol measures of *Pseudomonas syringae* pv. *syringae* associated with citrus blast disease. *Vegetos* **2020**, *33*, 555-569, doi:10.1007/s42535-020-00138-1.
35. Carezzano, M.E.; Sotelo, J.P.; Primo, E.; Reinoso, E.B.; Paletti Rovey, M.F.; Demo, M.S.; Giordano, W.F.; Oliva, M.d.I.M.; Flemetakis, E. Inhibitory effect of *Thymus vulgaris* and *Origanum vulgare* essential oils on virulence factors of phytopathogenic *Pseudomonas syringae* strains. *Plant Biology* **2017**, *19*, 599-607, doi:10.1111/plb.12572.
36. Shabani, B.; Rezaei, R.; Charehgani, H.; Salehi, A. Study on antibacterial effect of essential oils of six plant species against *Pseudomonas syringae* pv. *syringae* Van Hall 1902 and *Pseudomonas fluorescens* Migula 1894. *Journal of Plant Pathology* **2019**, *101*, 671-675, doi:10.1007/s42161-019-00266-x.
